# Supplementary material for: Different meaning of the mean heart dose between 3D-CRT and IMRT for breast cancer radiotherapy
Source: PubMed Central journal article supplement (PMC9886087; doi:10.3389/fonc.2022.1066915), 2023-01-16

Patient 1

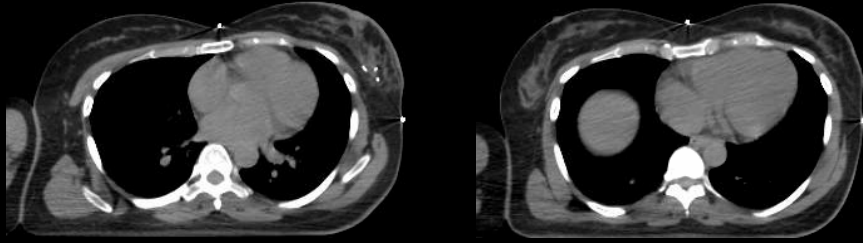

Patient 2

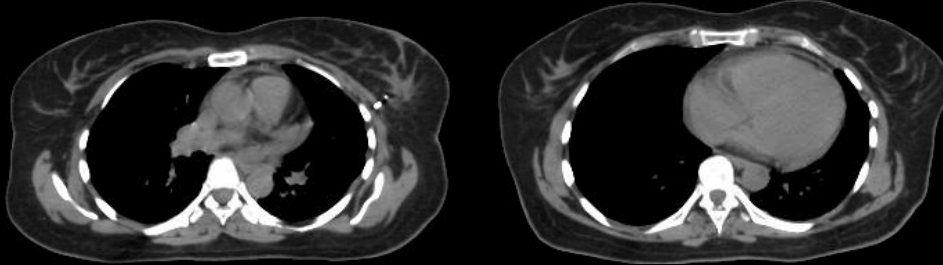

Patient 3

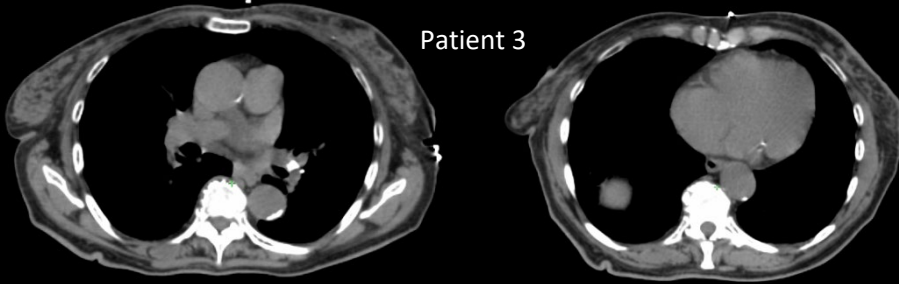

Patient 4

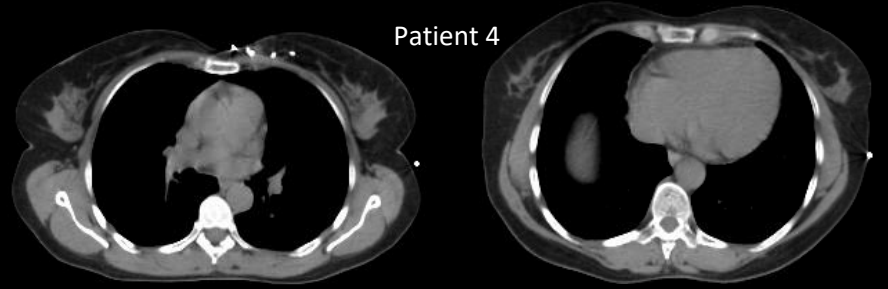

Patient 5

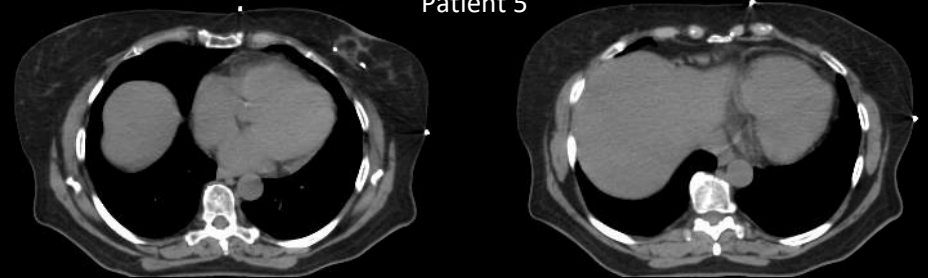

Patient 6

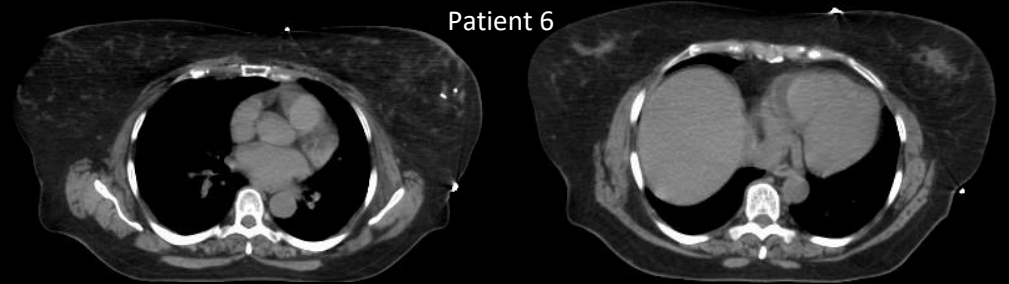

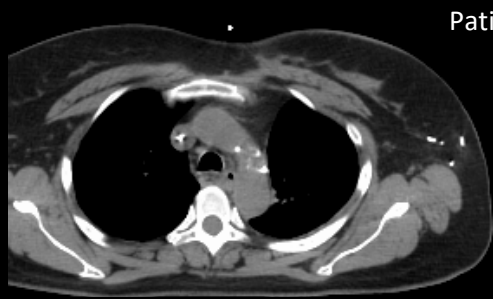

Patient 7

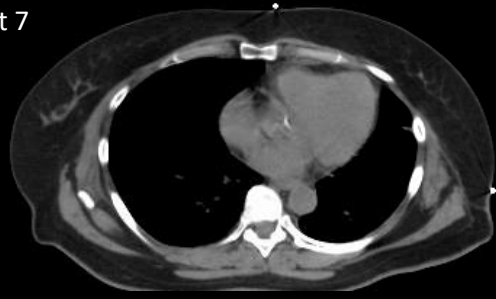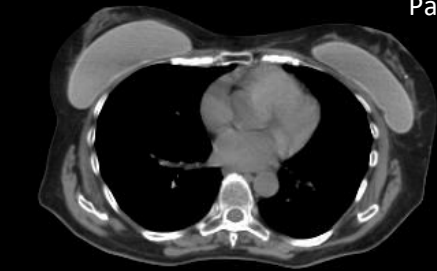

Patient 8

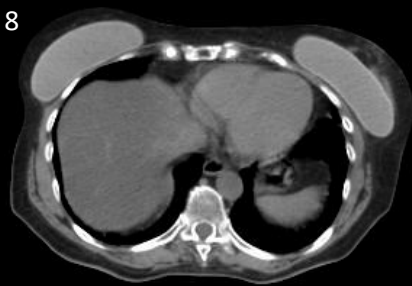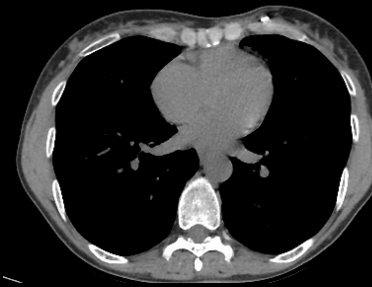

Patient 9

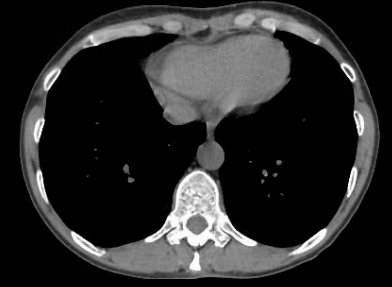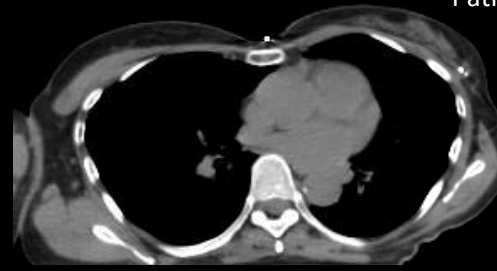

Patient 10

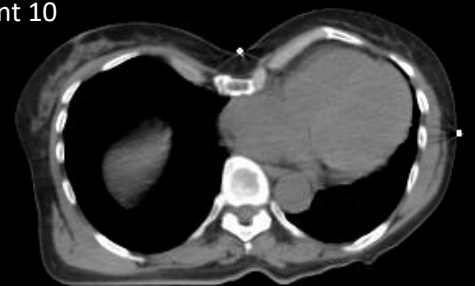

Supplement: Image_1.pdf [file Image_1.pdf]
